# Supplementary material for: Nanohybrids of reduced graphene oxide and cobalt hydroxide (Co(OH)2|rGO) for the thermal decomposition of ammonium perchlorate
Source: Royal Society of Chemistry journal article supplement (doi:10.1039/d0ra02853c), 2020-01-01
Supplement: d0ra02853c1.pdf [file d0ra02853c1.pdf]

## Supplementary Material

### Nanohybrids of reduced graphene oxide and cobalt hydroxide (Co(OH)<sub>2</sub>|rGO) for the thermal decomposition of ammonium perchlorate

Gabriel Abarca<sup>1</sup>, Paulina Ríos<sup>2</sup>, Paula Povea<sup>4</sup>, Christopher Cerda-Cavieles<sup>2</sup>, Cesar Morales-Verdejo<sup>1</sup>, Juan L. Arroyo<sup>4</sup>, María B. Camarada<sup>2,3\*</sup>

<sup>1</sup>Universidad Bernardo OHiggins, Escuela de Obstetricia y Puericultura, Centro Integrativo de Biología y Química Aplicada (CIBQA), Santiago, 8370993, Chile

<sup>2</sup>Centro de Nanotecnología Aplicada, Facultad de Ciencias, Universidad Mayor, Santiago, 8580745, Chile

<sup>3</sup>Núcleo de Química y Bioquímica, Facultad de Estudios Interdisciplinarios, Universidad Mayor, Santiago, 8580745, Chile

<sup>4</sup>Laboratorio de Materiales Energéticos, Instituto de Investigaciones y Control del Ejército de Chile (IDIC), Av. Pedro Montt 2136, 8370899, Santiago, Chile

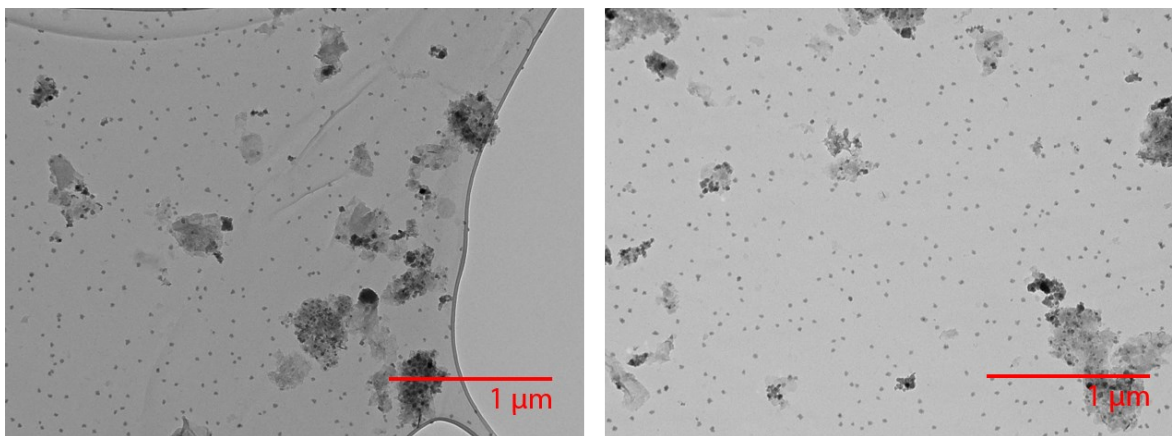

Figure S1: TEM images of the synthesized Co(OH)<sub>2</sub>|rGO nanoparticles.

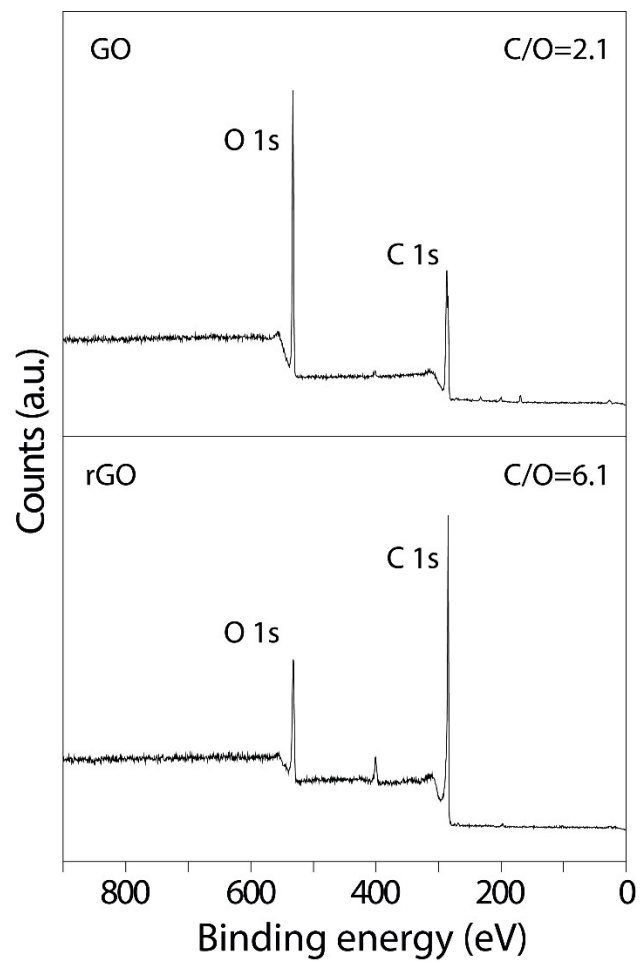

Figure S2: XPS measurements at the long scan region of GO and rGO.

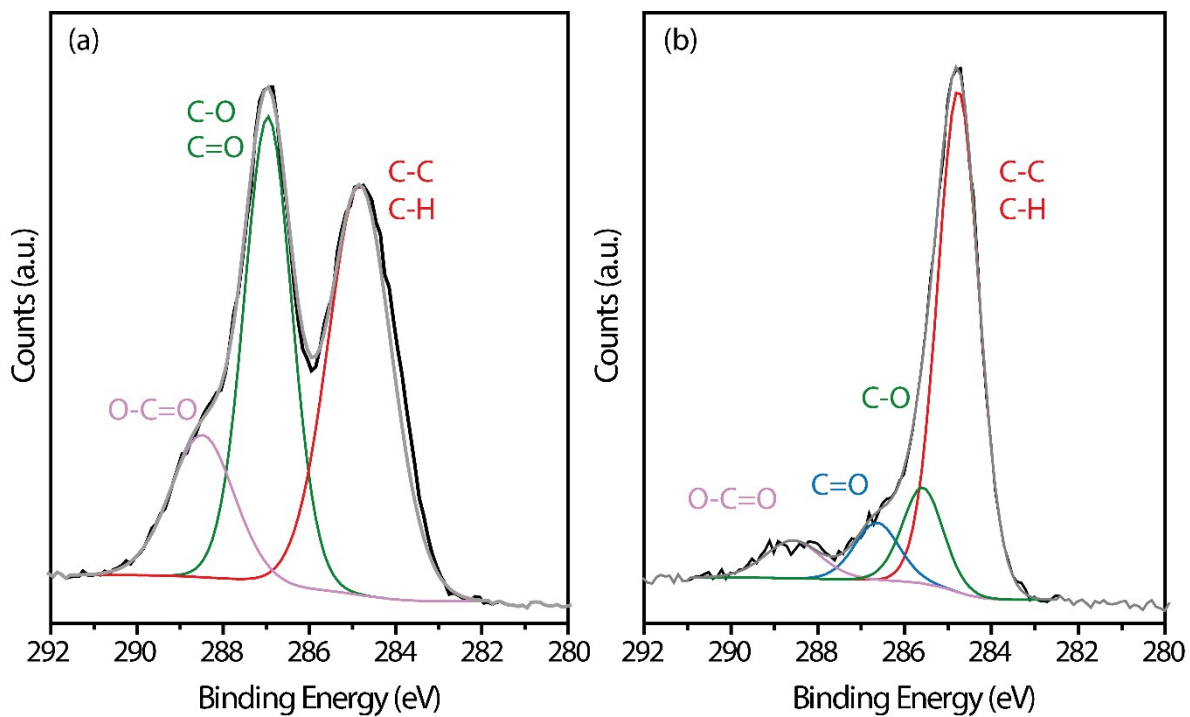

Figure S3: C 1s spectra for (a) GO and (b) rGO.

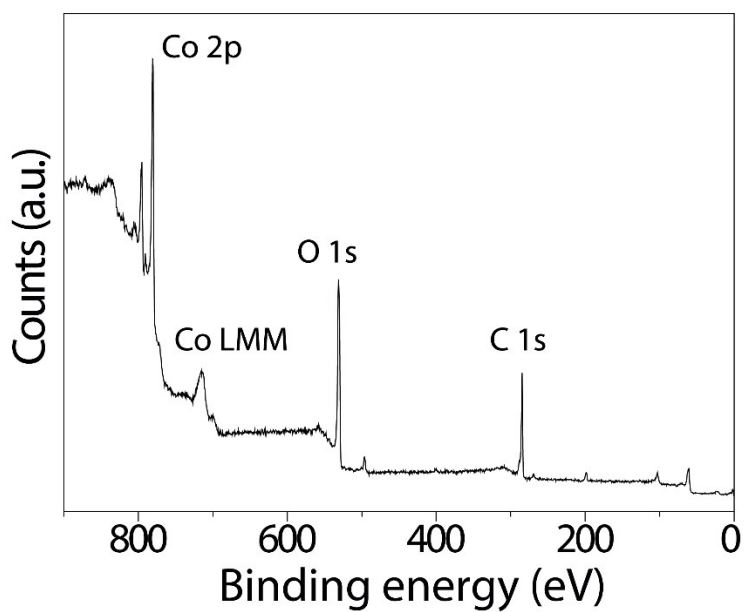

Figure S4: Wide scan XPS of the  $\text{Co(OH)}_2/\text{rGO}$  sample.

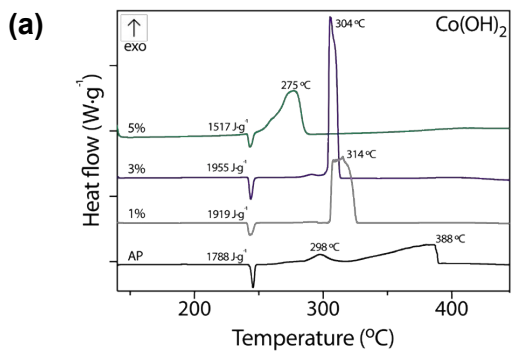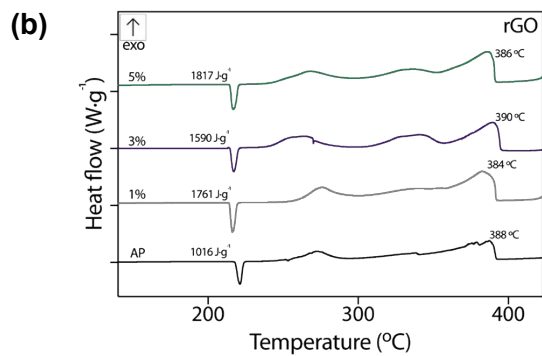

Figure S5: Thermal decomposition of pure AP with 1, 3, and 5 wt.% of (a) Co(OH)<sub>2</sub> and (b) rGO.
